# Supplementary material for: Boosting basic-peptide separation through dynamic electrostatic-repulsion reversed-phase (d-ERRP) liquid chromatography
Source: Royal Society of Chemistry journal article supplement (doi:10.1039/d0ra01296c), 2020-01-01
Supplement: d0ra01296c1.pdf [file d0ra01296c1.pdf]

***Boosting basic-peptide separation through dynamic electrostatic-repulsion reversed-phase (d-ERRP) liquid chromatography***

Giulia Mazzocanti\*, Simone Manetto, Michele Bassan, Alberto Foschini, Andrea Orlandin, Antonio Ricci\*, Walter Cabri, Omar H. Ismail, Martina Catani, Alberto Cavazzini, Francesco Gasparrini\*

**ELECTRONIC SUPPLEMENTARY INFORMATION (ESI)**

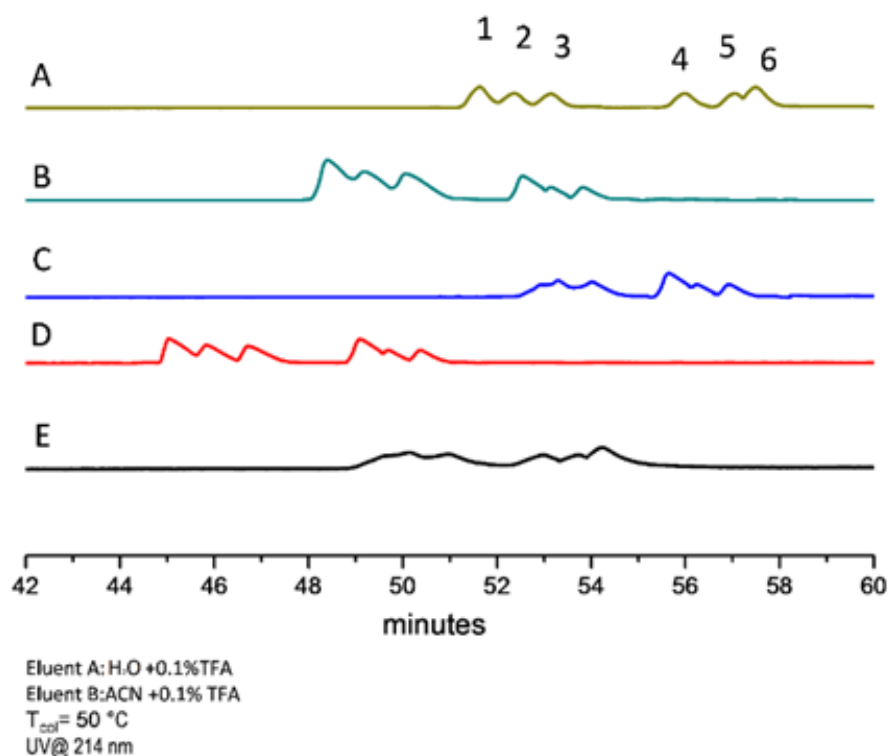

**Figure S1.** Chromatograms recorded by using mobile phases **1** described above. **A)** Column A, flow rate: 0.4 mL/min, gradient elution 23% B (0 min), 23% B (1 min), 28% B (61 min), 50% B (65min), 50% B (70 min) and 23% B (71min). **B)** Column B, flow rate: 0.4 mL/min, gradient elution 23% B (0 min), 23% B (1 min), 28% B (61 min), 50% B (65min), 50% B (70 min) and 23% B (71min). **C)** Column C, flow rate: 0.2 mL/min, gradient elution 24% B (0 min), 24% B (1 min), 29% B (61 min), 50% B (65min), 50% B (70 min) and 24% B (71min). **D)** Column D, flow rate: 0.4 mL/min, gradient elution 25% B (0 min), 25% B (1 min), 29% B (61 min), 50% B (65min), 50% B (70 min) and 25% B (71min). **E)** Column E, flow rate: 1.0 mL/min, gradient elution 26% B (0 min), 26% B (1 min), 31% B (61 min), 50% B (65min), 50% B (70 min) and 26% B (71min).

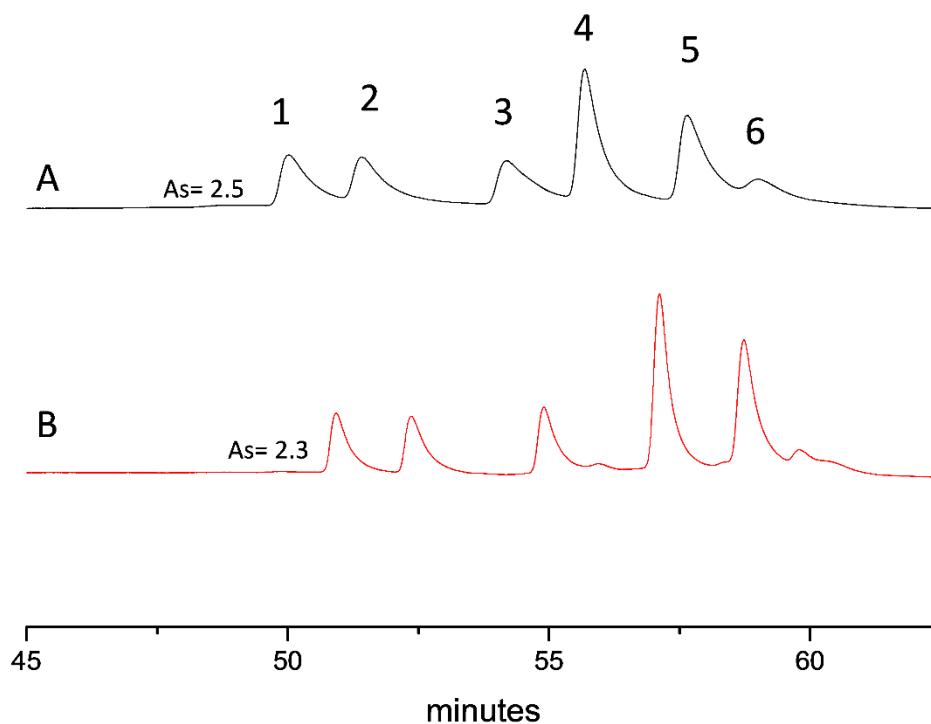

Eluent A: H<sub>2</sub>O+ H<sub>3</sub>PO<sub>4</sub> 15 mM+TBAOH 10 mM ( <sup>w</sup>pH = 2.2);  
 Eluent B: ACN + H<sub>3</sub>PO<sub>4</sub> 15 mM+TBAOH 10 mM ( <sup>A</sup>ppH = 3.8)  
 T<sub>col</sub> = 50 °C  
 UPLC Waters  
 UV@ 214 nm

**Figure S2.** Chromatograms recorded by using mobile phases **2** described in the main text (2.3 Chromatographic conditions). **A)** ACQUITY UPLC® BEH C18 (150 mm × 2.1 mm L. × I.D.) 1.7 μm 300Å, flow rate: 0.2 mL/min, gradient elution 18% B (0 min), 18% B (1 min), 23% B (61 min), 50% B (65min), 50% B (70 min) and 18% B (71min), **B)** Halo peptide C18 (150 mm × 3.0 mm L. × I.D.) 2.0 μm 160Å flow rate: 0.4 mL/min, gradient elution 18% B (0 min), 18% B (1 min), 23% B (61 min), 50% B (65min), 50% B (70 min) and 1% B (71min); columns and conditions were used.

**Table S1.** Chromatographic data for separation of the six reference standards in Figure S3 ESI.

|          | Column                                                                   | Rs 1-2 | Rs 2-3 | Rs 3-4 | Rs 4-5 | Rs 5-6 | $\mu_0$<br>(mm/s) | $t_G = 60$<br>minutes |
|----------|--------------------------------------------------------------------------|--------|--------|--------|--------|--------|-------------------|-----------------------|
| <b>A</b> | ACQUITY UPLC® BEH C18 (150 mm x 2.1 mm L. x I.D.) 1.7 $\mu\text{m}$ 300Å | 1.40   | 2.54   | 1.60   | 2.41   | -      | 1.40              | from 18% B to 23% B   |
| <b>B</b> | Halo peptide C18 (150 mm x 3.0 mm L. x I.D.) 2.0 $\mu\text{m}$ 160Å      | 2.43   | 4.28   | 4.19   | 3.00   | 1.99   | 1.67              | from 18% B to 23% B   |

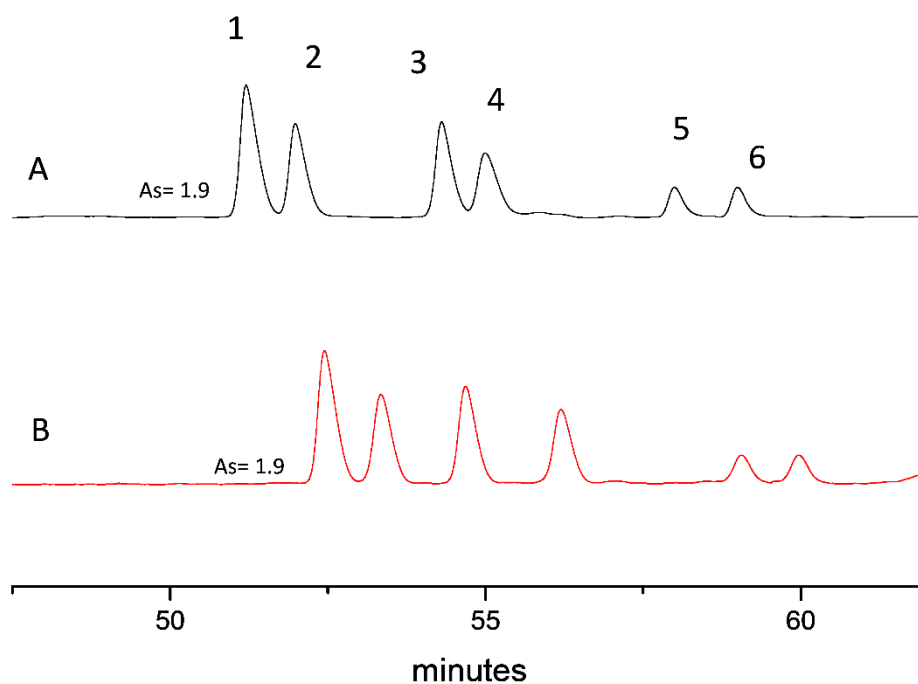

Eluent A: H<sub>2</sub>O+ TFA 13.1 mM+TBAOH 10 mM ( <sup>w</sup>pH = 2.5)  
 Eluent B: ACN + TFA 13.1 mM+TBAOH 10 mM ( <sup>A</sup>ppH = 4.2)  
 T<sub>cool</sub> = 50 °C  
 UPLC Waters  
 UV@ 214 nm

**Figure S3.** Chromatograms recorded by using mobile phases **3** described above in the main text (2.3 Chromatographic conditions). **A)** ACQUITY UPLC® BEH C18 (150 mm × 2.1 mm L. × I.D.) 1.7 μm 300Å, flow rate: 0.2 mL/min, gradient elution 18% B (0 min), 18% B (1 min), 23% B (61 min), 50% B (65min), 50% B (70 min) and 18% B (71min), **B)** Halo peptide C18 (150 mm × 3.0 mm L. × I.D.) 2.0 μm 160Å flow rate: 0.4 mL/min, gradient elution 18% B (0 min), 18% B (1 min), 23% B (61 min), 50% B (65min), 50% B (70 min) and 18% B (71min); columns and conditions were used.

**Table S2.** Chromatographic data for separation of the six reference standards in Figure S4 ESI.

|          | Column                                                                         | Rs 1-2 | Rs 2-3 | Rs 3-4 | Rs 4-5 | Rs 5-6 | $\mu_0$<br>(mm/s) | $t_G = 60$<br>minutes  |
|----------|--------------------------------------------------------------------------------|--------|--------|--------|--------|--------|-------------------|------------------------|
| <b>A</b> | ACQUITY UPLC® BEH<br>C18 (150 mm x 2.1 mm<br>L. x I.D.) 1.7 $\mu\text{m}$ 300Å | 1.20   | 4.28   | 2.26   | 2.76   | 2.17   | 1.40              | from 18% B<br>to 23% B |
| <b>B</b> | Halo peptide C18 (150<br>mm x 3.0 mm L. x I.D.)<br>2.0 $\mu\text{m}$ 160Å      | 1.99   | 3.24   | 3.86   | 4.67   | 2.20   | 1.67              | from 18% B<br>to 23% B |

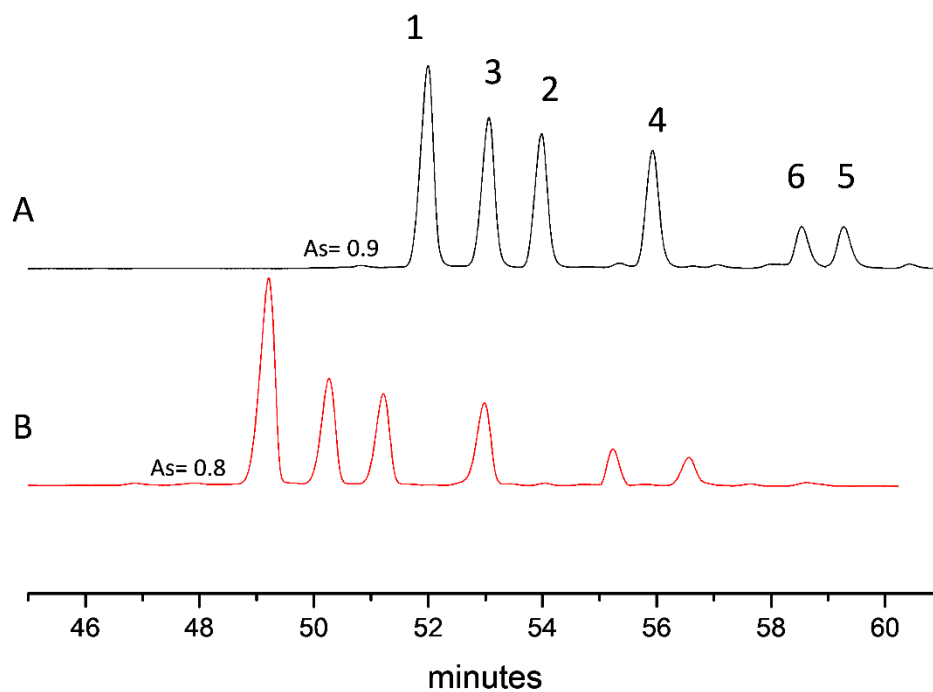

Eluent A: H<sub>2</sub>O+ TBAHSO<sub>4</sub> 10 mM ( <sup>w</sup>pH = 2.0)  
 Eluent B: ACN + TBAHSO<sub>4</sub> 10 mM ( <sup>A</sup>ppH =2.7)  
 T<sub>col</sub> = 50 °C  
 UPLC Waters  
 UV@ 214 nm

**Figure S4.** Chromatograms recorded by using mobile phases **4** described above in the main text (2.3 Chromatographic conditions). **A)** ACQUITY UPLC® BEH C18 (150 mm × 2.1 mm L. × I.D.) 1.7 μm 300Å, flow rate: 0.2 mL/min, gradient elution 23% B (0 min), 23% B (1 min), 28% B (61 min), 50% B (65min), 50% B (70 min) and 23% B (71min), **B)** Halo peptide C18 (150 mm × 3.0 mm L. × I.D.) 2.0 μm 160Å flow rate: 0.4 mL/min, gradient elution 23% B (0 min), 23% B (1 min), 28% B (61 min), 50% B (65min), 50% B (70 min) and 23% B (71min); columns and conditions were used.

**Table S3.** Chromatographic data for separation of the six reference standards in Figure S5 ESI.

|          | Column                                                             | Rs 1-3 | Rs 3-2 | Rs 2-4 | Rs 4-6 | Rs 6-5 | $\mu_0$<br>(mm/s) | $t_g = 60$<br>minutes |
|----------|--------------------------------------------------------------------|--------|--------|--------|--------|--------|-------------------|-----------------------|
| <b>A</b> | ACQUITY UPLC® BEH C18 (150 mm x 2.1 mm L. x I.D.) 1.7 $\mu$ m 300Å | 2.56   | 2.12   | 4.74   | 5.56   | 1.73   | 1.40              | from 23% B to 28% B   |
| <b>B</b> | Halo peptide C18 (150 mm x 3.0 mm L. x I.D.) 2.0 $\mu$ m 160Å      | 2.24   | 2.09   | 3.87   | 2.93   | 1.93   | 1.67              | from 23% B to 28% B   |



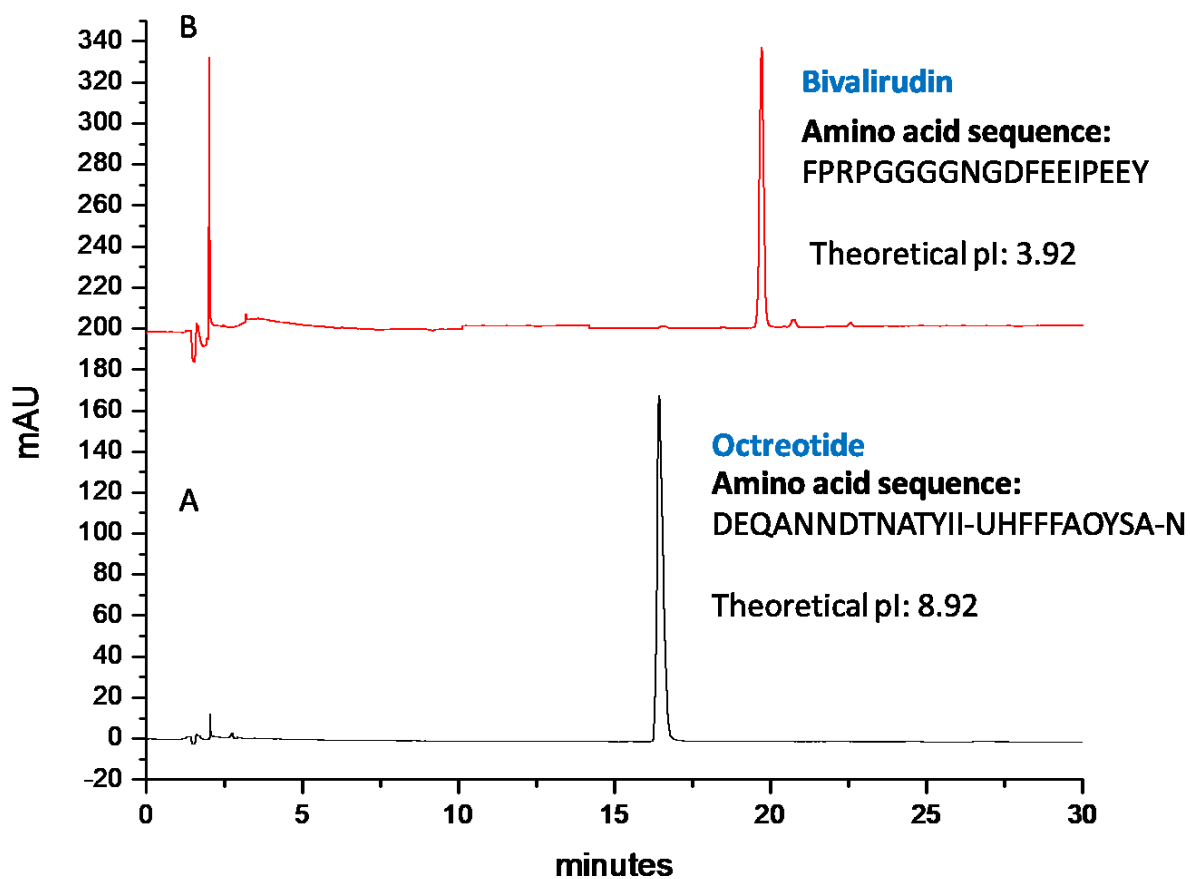

**Figure S5.** Analysis of A) octreotide and B) bivalirudin. The mobile phases 2 and column B were employed. Both analyses were carried out by using a gradient time of 30 minutes, gradient elution: A )13% B (0 min), 13% B (1 min), 19% B (31 min), 19% B (35min), 13% B (36 min) and 13% B (37min): B) 5% B (0 min), 5% B (1 min), 8% B (31 min), 8% B (35min), 5% B (36 min) and 5% B (37 min). Flow rate 0.4 mL/min, UV detection 214 nm.

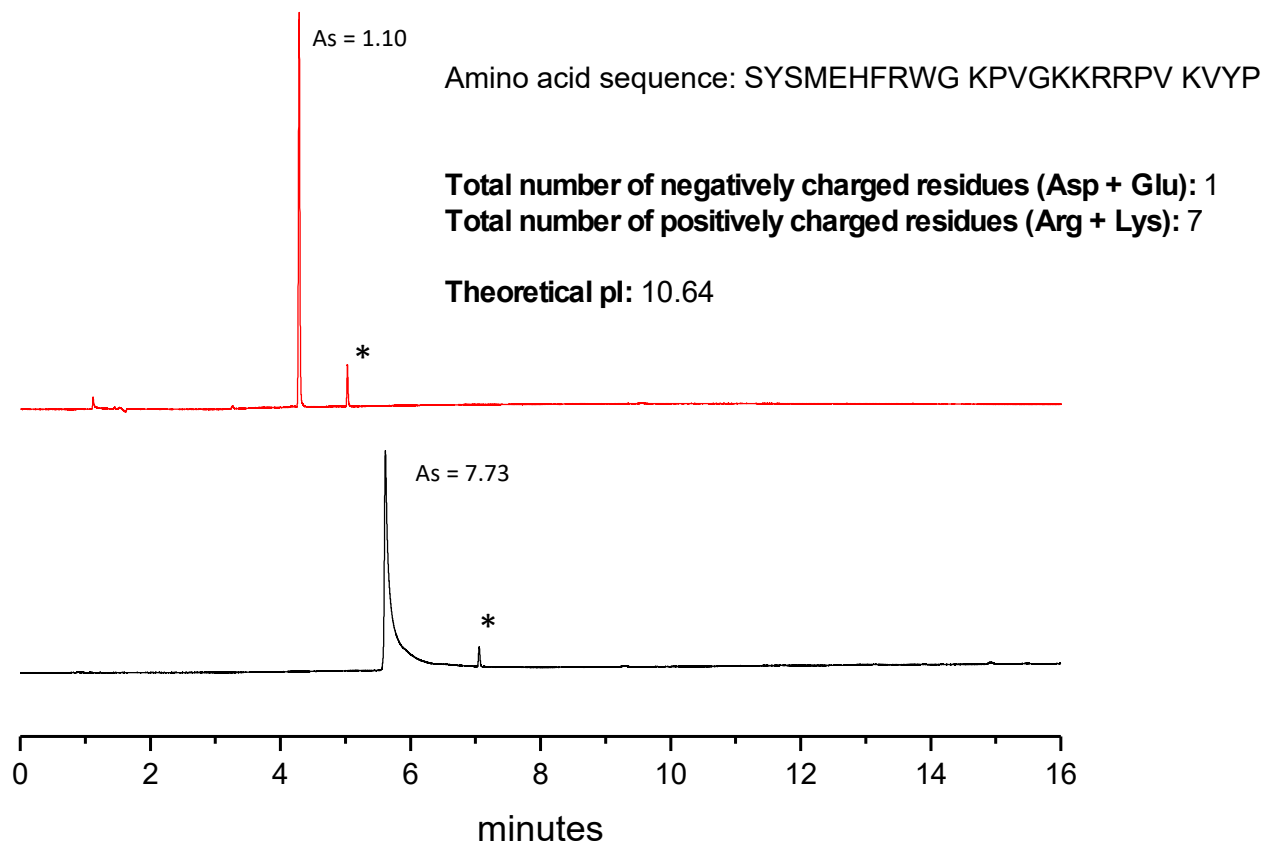

**Figure S6.** Analysis of a tetracosactide sample. The black trace refers to analysis in “static” ERRP mode [mobile phases 1 and column A (CSH column)]. The red trace refers to analysis in d-ERRP mode [mobile phases 5 and column E]. Both analyses were carried out by using a gradient time of 15 minutes ( gradient elution: 10% B (0 min), 10% B (1 min), 60% B (16 min), 60% B (20min), 10% B (21 min) and 10% B (31min)) and a flow rate of 0.4 mL/min. The asterisk denotes an unknown impurity.

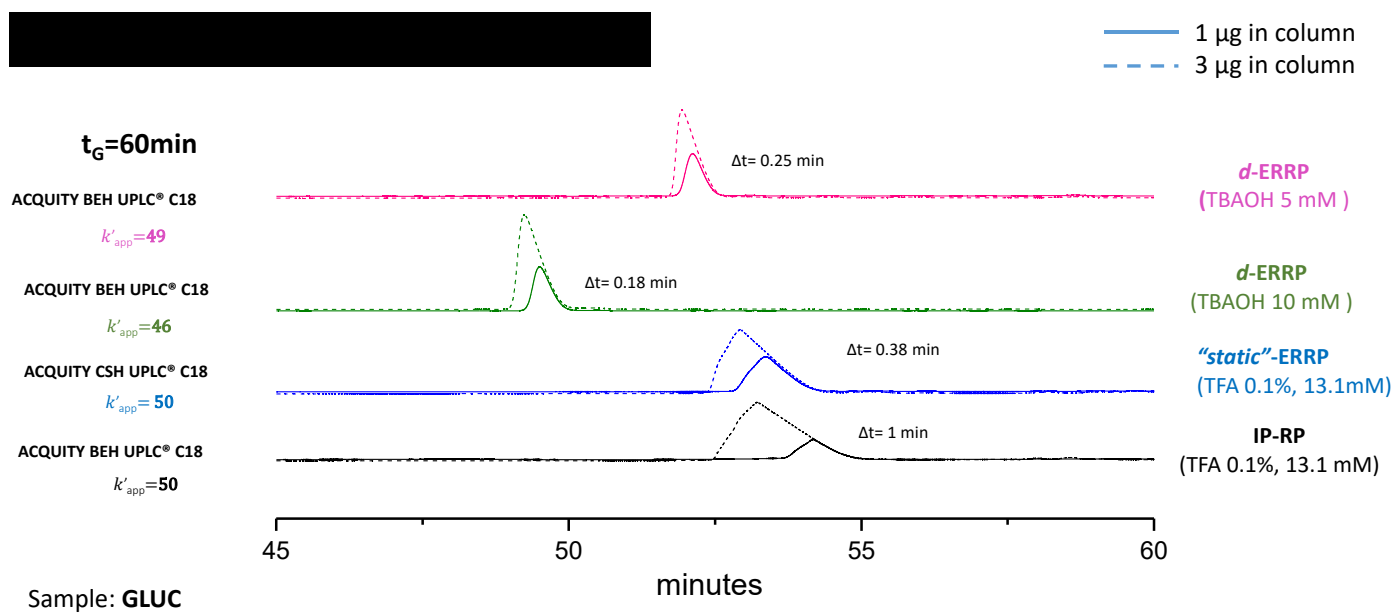

**Figure S7.** Overlaid chromatograms for 1.0–3.0  $\mu\text{g}$  GLUC. Columns packed with BEH and CSH particles (1.7  $\mu\text{m}$ , 130  $\text{\AA}$ ) with same geometry: 100 mm  $\times$  3.0 mm L.  $\times$  I.D.

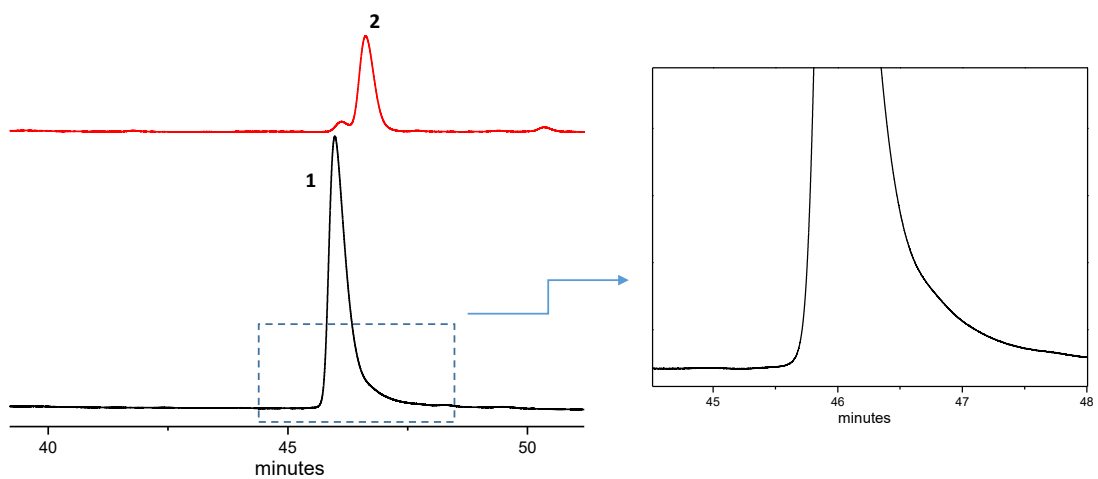

Column: Halo peptide C18 (150 mm x 3.0 mm L. x I.D.) 2.0  $\mu\text{m}$  160 $\text{\AA}$

Eluent A: 90% TEA-TFA/10% ACN

Eluent B: 40% TEA-TFA/60% ACN

Flow rate: 0.4 mL/min; Detector: UPLC Waters

UV@ 214 nm  $T_{\text{col}}=50^{\circ}\text{C}$   $t_{\text{G}}=60$  min

**Figure S8.** Analysis of **1** and **2** samples. Mobile phases: eluent A) 90:10 Buffer TFA+ TEA / ACN, eluent B) 60:40 Buffer TFA+ TEA/ACN, and Halo peptide C18 (150 mm  $\times$  3.0 mm L.  $\times$  I.D.) 2.0  $\mu\text{m}$  160 $\text{\AA}$  column (flow rate: 0.4 mL/min) were used. Analyses were carried out by using a gradient time of 60 minutes (gradient elution: 25% B (0 min), 25% B (1 min), 65% B (61 min), 100% B (65min), 100% B (70 min) and 25% B (71min)).
